# Supplementary material for: Full-color emission of a Eu3+-based mesoporous hybrid material modulated by Zn2+ ions: emission color changes for Zn2+ sensing via an ion exchange approach
Source: Royal Society of Chemistry journal article supplement (doi:10.1039/c9dt01668f), 2019-01-01
Supplement: c9dt01668f1.pdf [file c9dt01668f1.pdf]

## Supporting Information

### Full-color emission of a Eu<sup>3+</sup>-based mesoporous hybrid material modulated by Zn<sup>2+</sup> ions: emission color changes for Zn<sup>2+</sup> sensing via ion exchange approach

Zheng Zhang,<sup>‡</sup> Heng Li,<sup>‡</sup> Yajuan Li\*, Xudong Yu

**Synthesis of compound 1.** Compound 1 was synthesized according to a previously reported method.<sup>1</sup> Briefly, 2-acetylpyridine (4.84 g, 40 mmol) was mixed and dissolved in ethanol solution (60 mL). 4-Hydroxybenzaldehyde (2.44 g, 20 mmol) in ethanol solution (30 mL) was added, and the mixture was stirred for several minutes. Then, the mixture was added with an aqueous ammonium solution (50 mL, 25%) and stirred at 50 °C for 20 h. Then, a large amount of green solid was obtained when the pH of the solution was neutralized with hydrochloric acid (37%). The precipitate was collected and washed with ethanol to yield compound 1. The sample was dried overnight at 65 °C under vacuum.

**Synthesis of compound 2.** Compound 1 (1.3 g, 4 mol) and methyl bromoacetate (0.6 g, 4 mmol) were dissolved in anhydrous acetone (100 mL). Then, K<sub>2</sub>CO<sub>3</sub> (1.1 g, 8 mmol) and KI (0.3 g, 1.8 mmol) were added to the solution, and the resulting mixture was refluxed for 8 h. Finally, the reaction mixture was concentrated and purified through flash column chromatography with CHCl<sub>2</sub>/MeOH at 10/1 ratio as elution solvents. A white yellow solid was collected with a yield of 3.67 g (25%). <sup>1</sup>H NMR (500 M, CDCl<sub>3</sub>, δ): 3.84 (s, 3H), 4.72 (s, 2H), 7.03–7.05(d, 2H, J=8.5 Hz), 7.34–7.36 (m, 2H), 7.87–7.89 (d, 2H, J=8.5 Hz), 8.66–8.72 (m, 6H).

**Synthesis of 4'-(4-carboxy-methyleneoxyphenyl)-2,2':6',2''- terpyridinel (HL).** Compound 2 (1.6 g, 4 mmol) and LiOH·H<sub>2</sub>O (5.03 g, 120 mmol) were dissolved in the mixture solvents of THF and H<sub>2</sub>O (60 mL, v:v=1:1) and stirred for 72 h. The reaction mixture was concentrated and adjusted by HCl to pH=2–3. The resulting precipitate was collected and purified by chromatography on a silica gel with CHCl<sub>2</sub>/CH<sub>3</sub>OH mixture (20/1, v/v) as elution solvents to obtain a white yellow powder. Yield: 0.34 g (21%). The synthesis processes of compounds 1, 2, and HL are presented in Scheme. S1 (ESI<sup>+</sup>). <sup>1</sup>H NMR (500 M, CDCl<sub>3</sub>, δ): 4.63 (s, 2H), 7.08–7.09 (d, 2H, J=8Hz), 7.51–7.54 (m, 2H), 7.87–7.88 (d, 2H, J=8.5 Hz), 8.02–8.05 (m, 2H), 8.66–8.67 (m, 4H), 8.76–8.77 (d, 2H, J=4 Hz). Anal. Calcd for C<sub>23</sub>H<sub>17</sub>N<sub>3</sub>O<sub>3</sub>: C, 72.05; N, 10.96; H, 4.47; Found: C, 72.11; N, 10.92; H, 4.49.

#### Reference

- 1 S. X. Wang, W. H. Chu, Y. C. Wang, S. Y. Liu, J. C. Zhang, S. H. Li, H. Y. Wei, G. Q. Zhou and X. Y. Qin, *Appl. Organometal. Chem.*, 2013, **27**, 373-379.

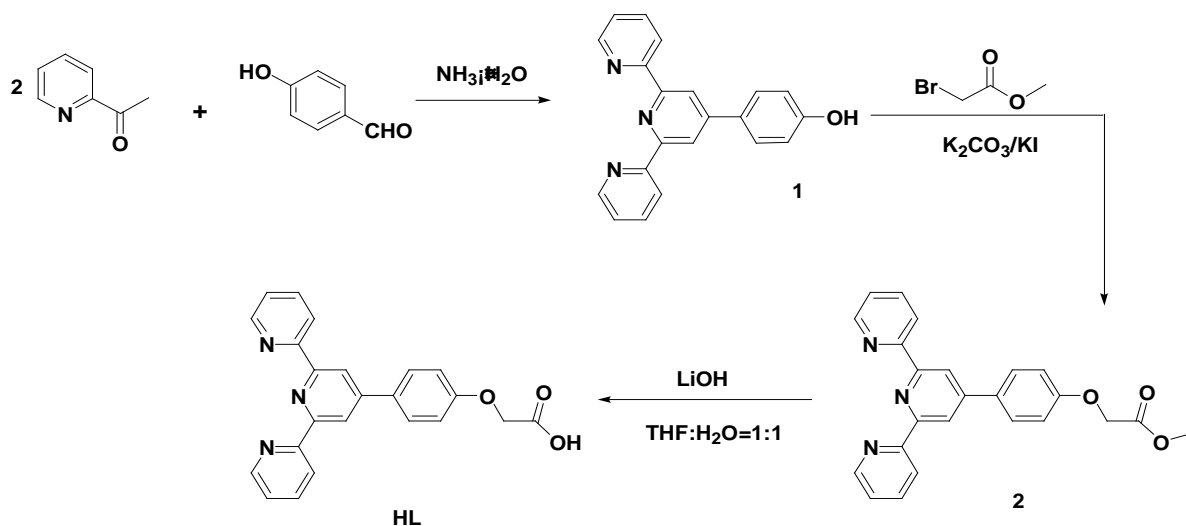

**Scheme. S1** Synthesis processes of the compounds 1, 2 and organic ligand HL.

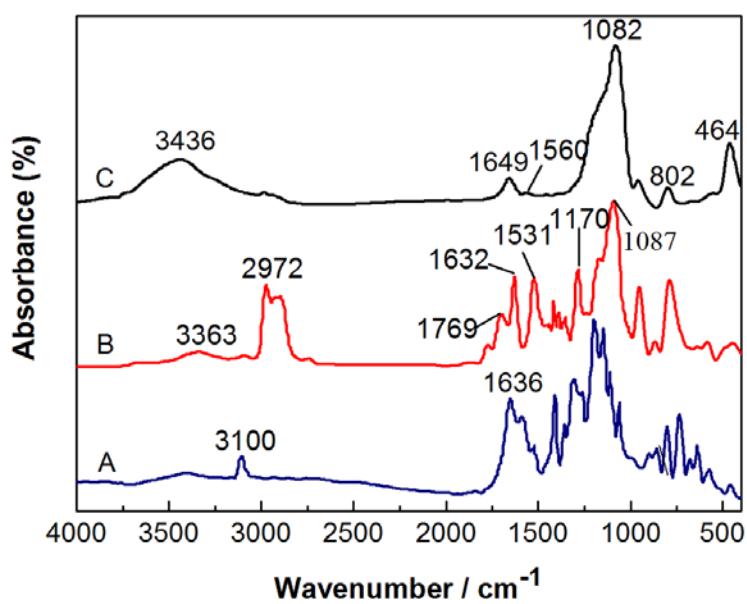

**Fig. S1** FTIR spectra of TTA(A), TTA-Si (B) and TTA-Si modified mesoporous silica nanoparticle TTA-MSN (C).

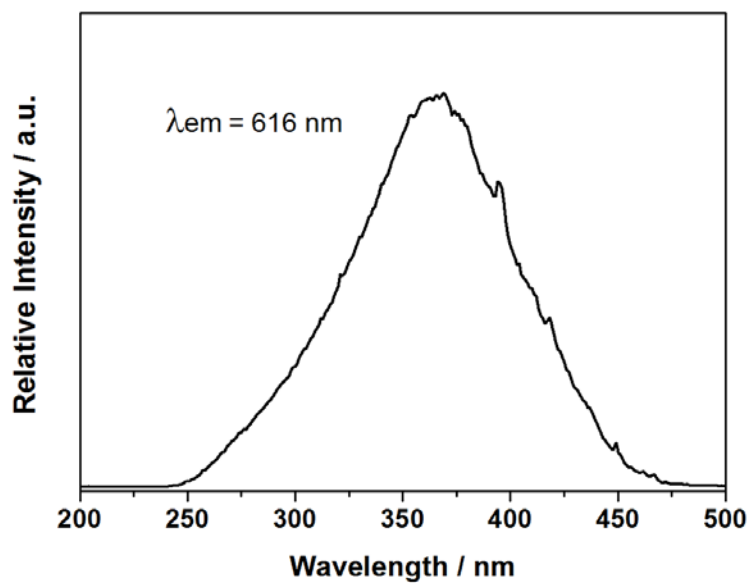

Fig. S2 The photoluminescent excitation spectrum of  $\text{Eu}(\text{TTA-MSN})_2\text{L}$ .

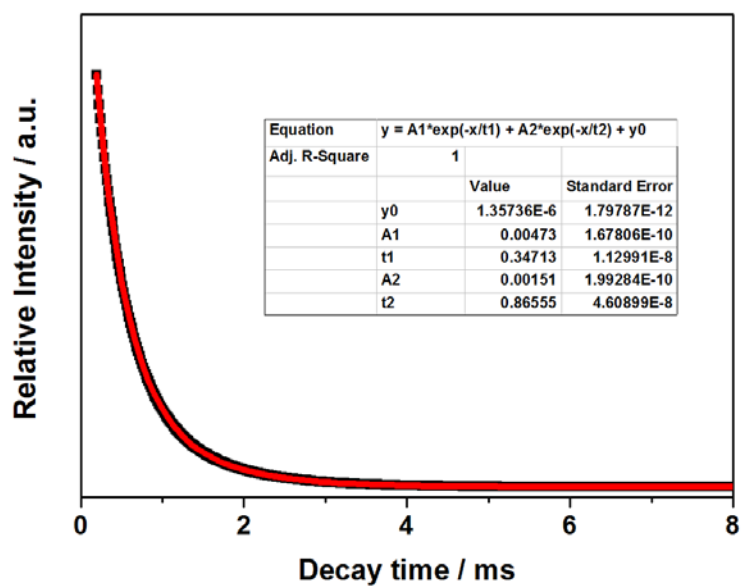

Fig. S3 Luminescence time decay curves for the sample  $\text{Eu}(\text{TTA-MSN})_2\text{L}$ .

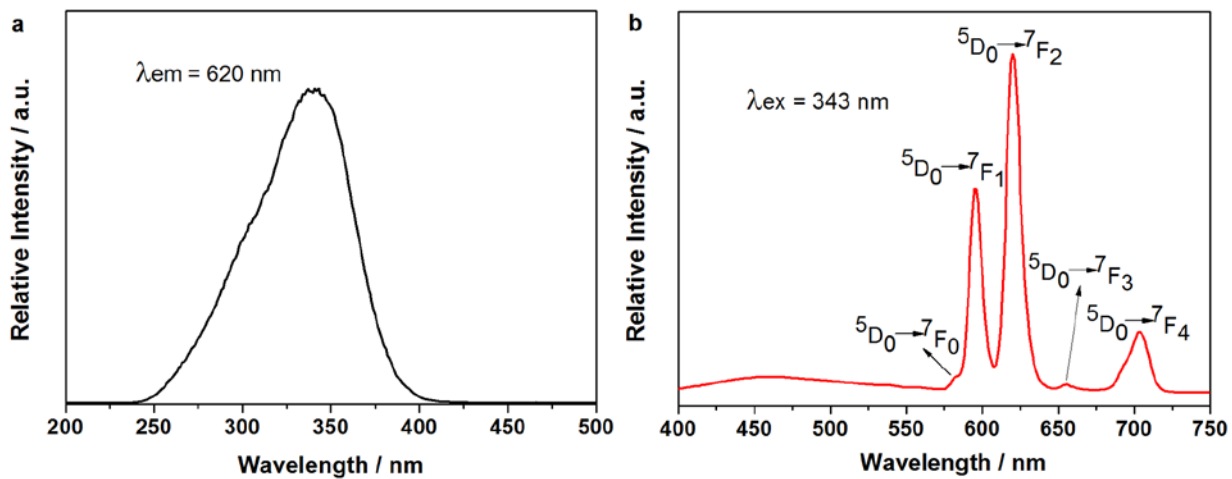

**Fig. S4** The excitation(a) and emission (b) spectra of the mesoporous hybrid material  $\text{Eu}(\text{TTA-MSN})_2\text{L}$  in aqueous solution (1mg / mL).

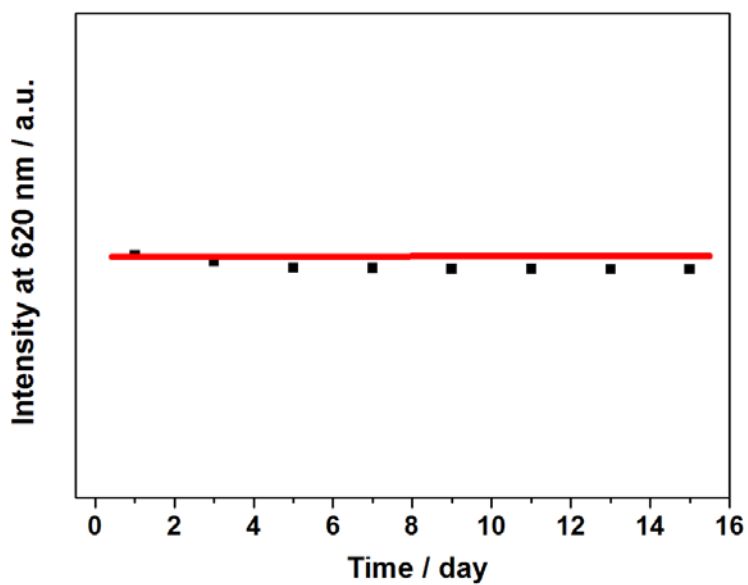

**Fig. S5** Day-to day fluorescence stability of  $\text{Eu}(\text{TTA-MSN})_2\text{L}$  in aqueous solution.

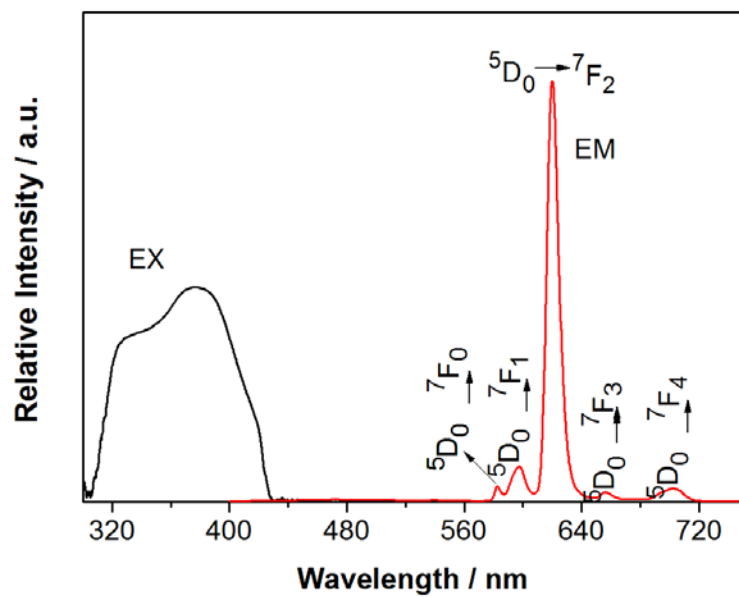

Fig. S6 The excitation (EX) and emission (EM) spectra of the pure Eu(TTA)<sub>2</sub>L complex.

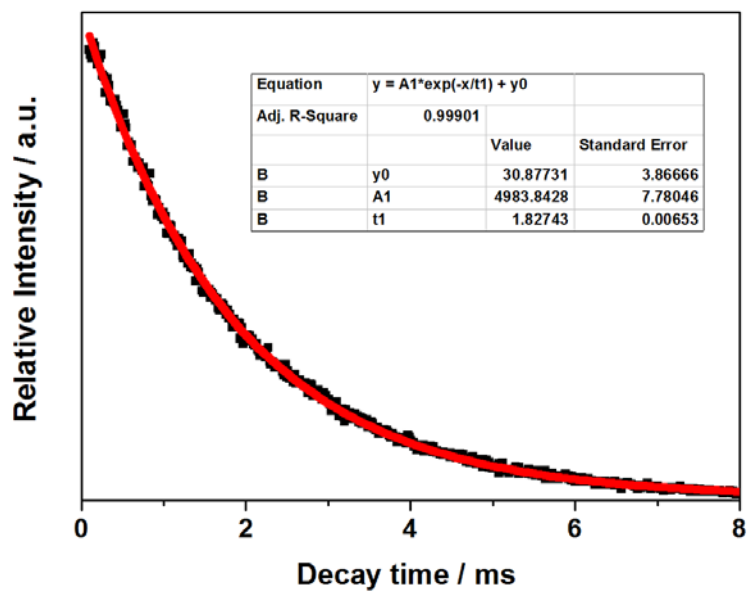

Fig. S7 Luminescence time decay curves for the sample Eu(TTA)<sub>2</sub>L.

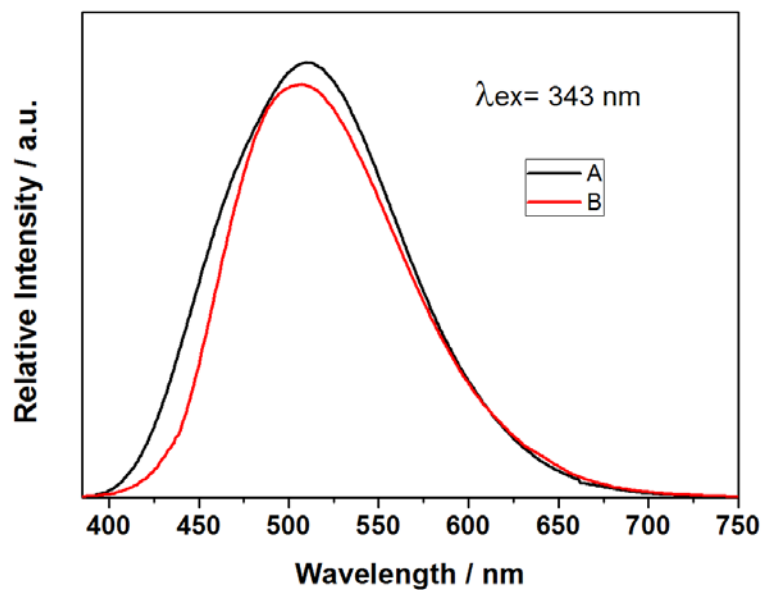

**Fig.S8** Emission spectra of Eu(TTA-MSN)<sub>2</sub>L in aqueous solution solutions (1 mg/mL) upon the addition of Zn<sup>2+</sup> ( $2 \times 10^{-4}$  mol/L) (A) and Emission spectra of Eu(TTA-MSN)<sub>2</sub>L in aqueous solution solutions (1 mg/mL) upon the addition of Zn<sup>2+</sup> ( $2 \times 10^{-4}$  mol/L) in the presence of other mixture cations ( $2 \times 10^{-4}$  mol/L) (B).

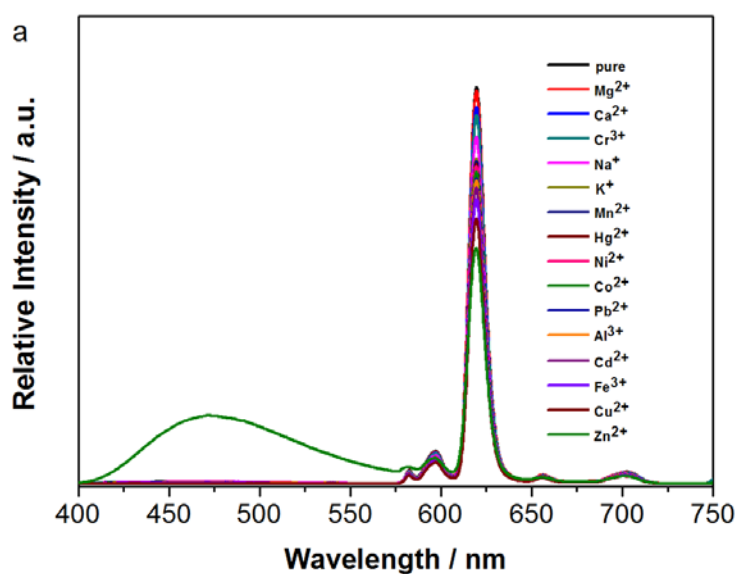

**Fig. S9** Emission spectra of Eu(TTA)<sub>2</sub>L in the aqueous solutions containing different metal ions (1 mg/ mL) when excited at 351 nm.

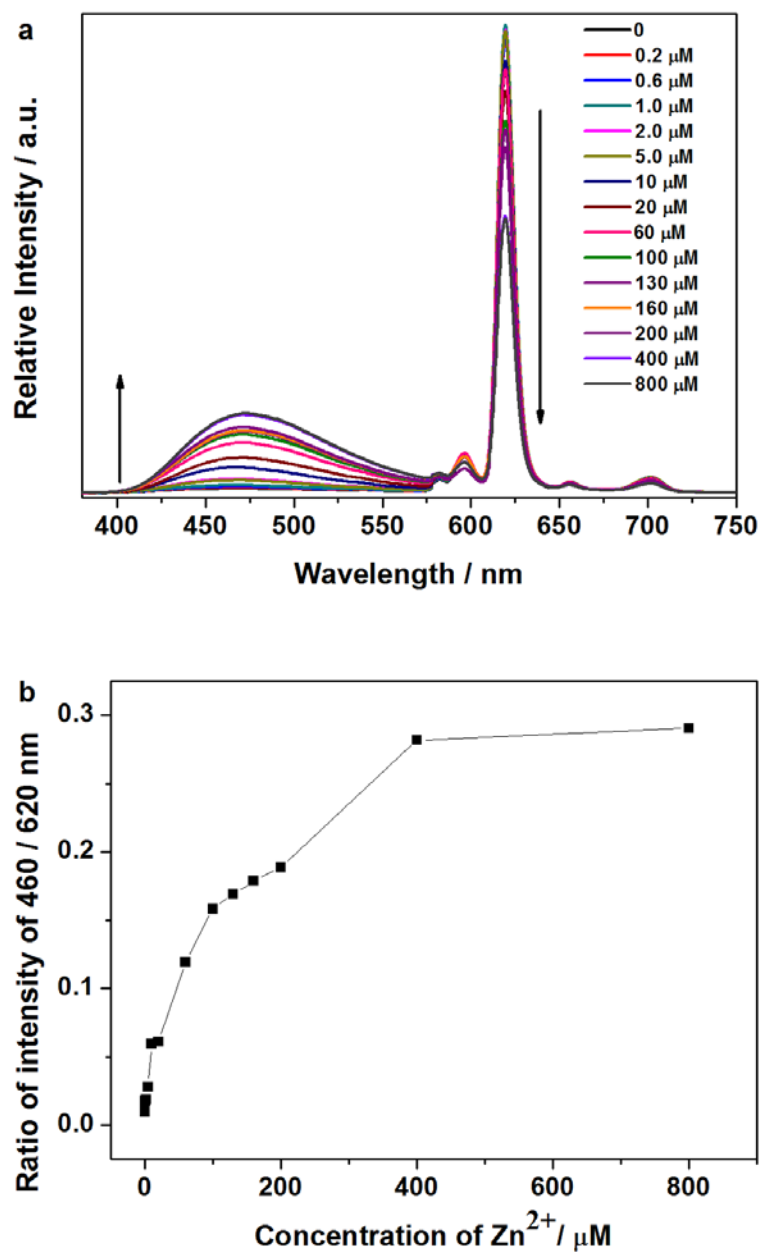

**Fig. S10** (a) Photoluminescent spectra of Eu(TTA)<sub>2</sub>L in aqueous solutions in the presence of various concentration of Zn<sup>2+</sup> at an excitation of 371 nm; (b) Ratio of intensity of 472 nm/620 nm of Eu(TTA)<sub>2</sub>L in aqueous solutions in the presence of various concentration of Zn<sup>2+</sup> at an excitation of 371 nm.

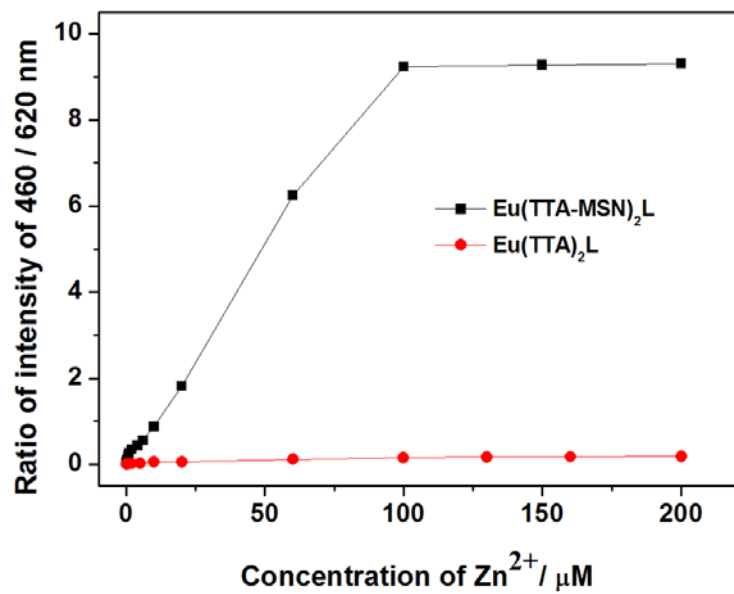

**Fig. S11** Ratio of intensity of ligand emission / 620 nm in mesoporous hybrid material  $\text{Eu}(\text{TTA-MSN})_2\text{L}$  and  $\text{Eu}(\text{TTA})_2\text{L}$ .

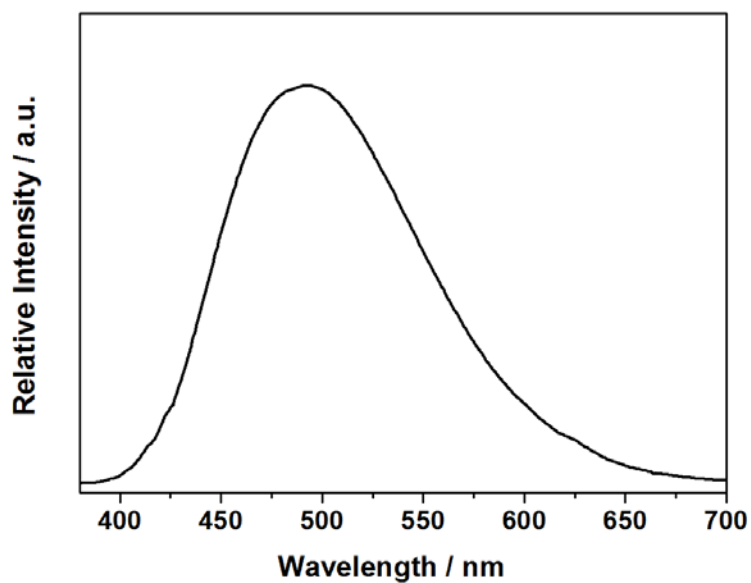

**Fig. S12** Emission spectra of  $\text{Zn}^{2+}$ -centered mesoporous hybrid material  $\text{Zn}(\text{TTA-MSN})\text{L}$ .



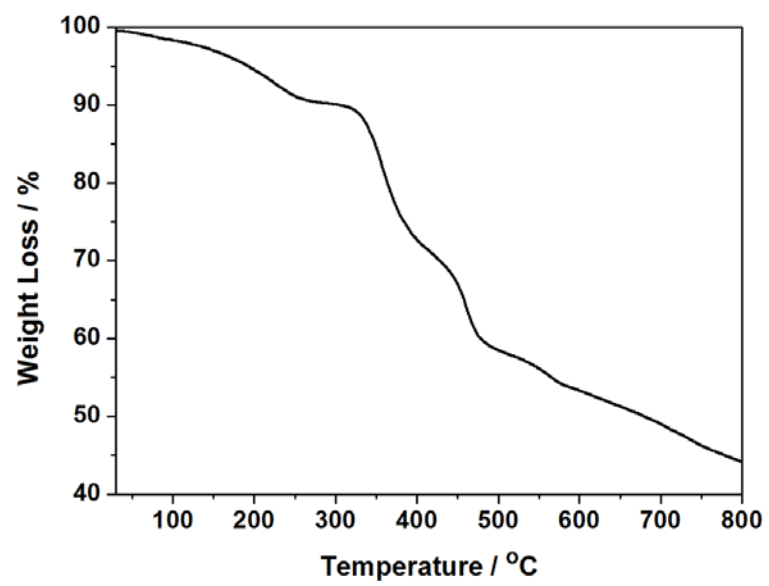

**Fig. S13** Thermogravimetry curve of pure complex Eu(TTA)<sub>2</sub>L.
